# Supplementary material for: Essential Mineral Content (Fe, Mg, P, Mn, K, Ca, and Na) in Five Wild Edible Species of Lactarius Mushrooms from Southern Spain and Northern Morocco: Reference to Daily Intake
Source: MDPI journal article supplement (doi:10.3390/jof8121292), 2022-12-10
Supplement: s1 [file s1]

# Essential Mineral Content (Fe, Mg, P, Mn, K, Ca, and Na) in Five Wild Edible Species of *Lactarius* Mushrooms from Southern Spain and Northern Morocco: Reference to Daily Intake

Alejandro R. López <sup>1,a</sup>, Marta Barea-Sepúlveda <sup>1,a</sup>, Gerardo F. Barbero <sup>1,\*</sup>, Marta Ferreiro-González <sup>1</sup>, José Gerardo López-Castillo <sup>2</sup>, Miguel Palma <sup>1</sup> and Estrella Espada-Bellido <sup>1,\*</sup>

## Supplementary Material

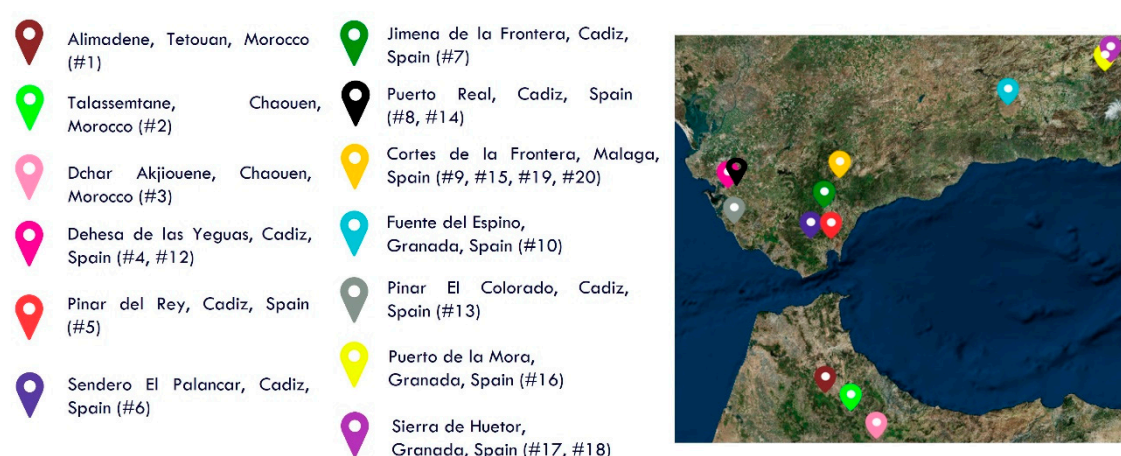

**Figure S1.** Map with the locations of the different sampling places of the studied mushrooms.

**Table S1.** Results of One-Way ANOVA test performed with a confidence level of 95% for quantified each essential metal in the *Lactarius* mushrooms collected in northern Morocco and southern Spain.

| Essential metal | One-Way ANOVA            |
|-----------------|--------------------------|
| Fe              | $F = 0.28$               |
|                 | $p\text{-value} = 0.887$ |
| Mg              | $F = 2.17$               |
|                 | $p\text{-value} = 0.122$ |
| Mn              | $F = 2.52$               |
|                 | $p\text{-value} = 0.085$ |
| Ca              | $F = 1.09$               |
|                 | $p\text{-value} = 0.398$ |
| K               | $F = 4.01$               |
|                 | $p\text{-value} < 0.05$  |
| P               | $F = 3.72$               |
|                 | $p\text{-value} < 0.05$  |
| Na              | $F = 7.72$               |
|                 | $p\text{-value} < 0.05$  |
